1 Estrogen attenuates the growth of human papillomavirus positive  
2 epithelial cells

3 Molly L. Bristol<sup>1\*</sup>, Claire D. James<sup>1</sup>, Xu Wang<sup>1</sup>, Christian T. Fontan,<sup>1</sup> and  
4 Iain M. Morgan<sup>1,2</sup>

5 <sup>1</sup>Virginia Commonwealth University, Philips Institute for Oral Health Research, School of  
6 Dentistry

7 <sup>2</sup>VCU Massey Cancer Center

8 \*corresponding author: mlbristol@vcu.edu

9 Running title: Estrogen regulation of HPV positive cell growth

10

11

12 **Abstract**

13 Human papillomaviruses (HPVs) are small, double-stranded DNA viruses that are  
14 significant risk factors in the development of cancer, and HPV accounts for  
15 approximately 5% of all worldwide cancers. Recent studies using data from The Cancer  
16 Genome Atlas (TCGA) have demonstrated that elevated levels of estrogen receptor  
17 alpha (ER $\alpha$ ) are associated with improved survival in oropharyngeal cancers, and these  
18 elevated receptor levels were linked with human papillomavirus positive cancers  
19 (HPV+cancers). There has been a dramatic increase in HPV-related head and neck  
20 squamous cell carcinomas (HPV+HNSCCs) over the last two decades and therapeutic  
21 options for this ongoing health crisis are a priority; currently there are no anti-viral  
22 therapeutics available for combating HPV+cancers. During our own TCGA studies on  
23 head and neck cancer we had also discovered the overexpression of ER $\alpha$  in  
24 HPV+cancers. Here we demonstrate that 17 $\beta$ -estradiol (estrogen) attenuates the  
25 growth/cell viability of HPV+cancers *in vitro*, but not HPV negative cancer cells. In  
26 addition, N/Tert-1 cells (foreskin keratinocytes immortalized with hTERT) containing  
27 HPV16 have elevated levels of ER $\alpha$  and growth sensitivity following estrogen treatment  
28 when compared with parental N/Tert-1. Finally, we demonstrate that there are  
29 potentially two mechanisms contributing to the attenuation of HPV+ cell growth following  
30 estrogen treatment. First, estrogen represses the viral transcriptional long control region  
31 (LCR) downregulating early gene expression, including E6/E7. Second, expression of  
32 E6 and E7 by themselves sensitizes cells to estrogen. Overall our results support the  
33 recent proposal that estrogen could be exploited therapeutically for the treatment of  
34 HPV positive oral cancers.

35 **Importance**

36 Human papillomaviruses cause around 5% of all human cancers, yet there are no  
37 specific anti-viral therapeutic approaches available for combating these cancers. These  
38 cancers are currently treated with standard chemo-radiation therapy (CRT). Specific  
39 anti-viral reagents are desperately required, particularly for HPV+HNSCC whose  
40 incidence is increasing and for which there are no diagnostic tools available for  
41 combating this disease. Using data from The Cancer Genome Atlas (TCGA) ourselves  
42 and others determined that the estrogen receptor  $\alpha$  (ER $\alpha$ ) is overexpressed in  
43 HPV+HNSCC, and that elevated levels are associated with an improved disease  
44 outcome. This has led to the proposal that estrogen treatment could be a novel  
45 therapeutic approach for combating HPV+cancers. Here we demonstrate that estrogen  
46 attenuates the growth of HPV+epithelial cells using multiple mechanisms, supporting  
47 the idea that estrogen has potential as a therapeutic agent for the treatment of  
48 HPV+HNSCC.

49

## 50 **Introduction**

51 HPV is the most common sexually transmitted infection in the United States, infecting  
52 nearly every sexually active person at some point in their lives(1–8). Of the high-risk  
53 HPVs known to cause cancers, HPV16 is the most common genotype, accounting for  
54 50% of cervical cancers and nearly 90% of HPV+HNSCCs(4, 9, 10). The level of HPV-  
55 related HNSCCs has become an epidemic in the last decade, with over half a million  
56 new cases per year worldwide(11). While prophylactic vaccines should be successful in  
57 preventing future HPV infections, there are currently no HPV-specific antiviral drugs to  
58 treat current HPV infections or HPV+HNSCC.

59 A number of studies have implicated steroid hormones, including  $17\beta$ -estradiol  
60 (estrogen), as co-factors in HPV carcinogenesis(12–17). For example, the estrogen  
61 receptor has been shown to play an important role in the development of cervical  
62 cancer in a K14-HPV16 E7 transgenic mouse model, where estrogen was determined  
63 to work as a co-carcinogen with E7(14–16, 18, 19). However, the role of estrogen in the  
64 development of head and neck cancer in these transgenic mouse models has not been  
65 reported. In contrast to these results, studies demonstrate that high ER $\alpha$  expression  
66 correlates with increased survival in HPV+HNSCC(20, 21). These reports suggest ER $\alpha$   
67 as a diagnostic marker but also raise the possibility of using estrogen as a therapeutic  
68 for the treatment of HPV+HNSCC. In support of the potential therapeutic potential of  
69 estrogen for HPV+ cancers, HeLa cells, an HPV18+ cervical cancer cell line, are  
70 extremely sensitive to estrogen treatment(22, 23). Given these recent reports we  
71 investigated the ability of estrogen to regulate the growth of HPV+ cell lines.

72 Analysis of our TCGA data agreed with those of others; the ER $\alpha$  receptor was  
73 overexpressed in HPV+HNSCC when compared with HPV-HNSCC, and higher  
74 expression predicted better overall survival(20, 21, 24). Here we report that estrogen  
75 treatment results in growth attenuation of HPV16+HNSCC lines (SCC47 and  
76 UMSCC104) but does not significantly alter the growth of HPV negative cancer cell  
77 lines. Previously we reported the transcriptional reprogramming of N/Tert-1 cells  
78 (foreskin cells immortalized by hTERT) by HPV16 (N/Tert-1+HPV16) and demonstrate  
79 here that the growth of these cells is attenuated by estrogen while control parental  
80 N/Tert-1 cell growth was not affected by estrogen treatment. We also treated human  
81 tonsil keratinocytes that were immortalized by HPV16 (HTK+HPV16) and these were  
82 severely growth attenuated following estrogen treatment. In SCC47, UMSCC104,  
83 UMSCC152, N/Tert-1+HPV16 (clonal and pooled lines), and HTK+HPV16 treated with  
84 estrogen, a significant reduction of early genes RNA transcript levels, including E6 and  
85 E7, is observed. Using HPV16-LCR (the long control region that regulates transcription  
86 from the HPV16 genome) luciferase vectors we demonstrate that estrogen can  
87 downregulate transcription from the HPV16 LCR. This down regulation has the potential  
88 to increase the p53 and pRb levels in the cells (the cellular targets for E6 and E7  
89 respectively that promote degradation of these tumor suppressors). However, while p53  
90 levels were altered in SCC47 and UMSCC104 cells, it was not altered in other lines;  
91 similarly, pRb was only significantly altered in HeLa cells, indicating the story may be  
92 more complex. While PARP1 cleavage was observed in SCC47, UMSCC152 and HeLa  
93 cells, it was not significantly altered in UMSCC104 cells, suggesting that growth  
94 attenuation is mediated by both apoptotic and non-apoptotic mechanisms, depending

95 on the cell line. Finally, we treated N/Tert-1 cells expressing E6, E7 or E6+E7  
96 (generated using retroviral transduction of the viral genes) with estrogen and  
97 demonstrate that expression of these viral oncoproteins by themselves results in growth  
98 attenuation of N/Tert-1 cells following estrogen treatment, however this growth  
99 attenuation is delayed when compared to N/Tert-1+HPV16 cells(25). Moreover, in these  
100 E6, E7, or E6+E7 cells the viral oncogene expression is not driven by the LCR and the  
101 levels of the viral RNA transcript do not change following estrogen treatment. In  
102 conclusion, the results demonstrate that estrogen attenuates the growth of HPV16+  
103 keratinocytes and HPV+ cancer cells, and that there are potentially dual mechanisms  
104 for this attenuation; repression of viral transcription via targeting of the LCR, and cellular  
105 reprogramming of the host by E6/E7 that promotes the estrogen sensitivity. Our results  
106 support the idea that estrogen can be used as a potential therapeutic for the treatment  
107 of HPV+HNSCC. In further support of this idea, we demonstrate that estrogen plus  
108 radiation treatment of the HPV+HNSCC line, SCC47 results in an additive attenuation of  
109 cell growth. No such affect was observed in the control HPV-HNSCC line, HN30.

110

111 **Results**

112 ***Estrogen attenuates the growth of HPV16 positive head and neck cancer cell***  
113 ***lines.***

114 We have reported differential gene expression between HPV16+HNSCC and HPV-  
115 HNSCC using data from TCGA(24). We further analyzed this and observed that the  
116 ER $\alpha$  receptor expression was increased in HPV16+HNSCC versus HPV-HNSCC; as we  
117 were doing these studies two other reports were published demonstrating the increased  
118 expression of ER $\alpha$  in HPV+HNSCC(20, 21). Moreover, these studies demonstrated that  
119 increased levels of ER $\alpha$  predicted better survival suggesting that this receptor may be of  
120 diagnostic significance and that estrogen could be a novel therapeutic for targeting  
121 HPV+HNSCC(20, 21). We investigated the protein expression levels of ER $\alpha$  in HPV  
122 positive and negative cancer cells (Figure 1A). It is clear from this figure that any minor  
123 differences in protein expression of the ER $\alpha$  do not appear to be solely dependent on  
124 the HPV status of the cell line. Nevertheless, we proceeded to treat SCC47,  
125 UMSCC104 (HPV16+HNSCC integrated and episomal, respectively), C33a (HPV  
126 negative cervical cancer cell line) and HN30 (HPV-HNSCC) with estrogen and  
127 monitored cellular growth over a 6-day period (Figure 1B). There was a significant  
128 attenuation of the growth with SCC47 (i) and UMSCC104 (ii) following treatment with  
129 estrogen, but not with C33a (iii) or HN30 (iv). Likewise, the HPV18+ HeLa cervical  
130 cancer cells were also grown in the presence or absence of estrogen. Strikingly, all the  
131 HeLa cells appeared to be dead with the estrogen treatment at 72 hours (Figure 1Ci)  
132 when trying to observe HeLa cell growth in the presence or absence of estrogen,  
133 rendering cell growth observation impossible. To further analyze estrogen treatment in

134 HeLa, cells were treated with varying doses of estrogen for 48-hours, and subjected to a  
135 cell viability assay by monitoring ATP release via Cell Titer-Glo; as observed in (Figure  
136 1Cii), estrogen significantly reduced HeLa cell viability at all doses tested. The recently  
137 published data by Li et al also observed this phenomena, and indicates that estrogen  
138 may provide a unique approach to attenuate the growth or to kill HPV+ cells(23).

139 We further investigated whether the estrogen treatment reduced the levels of HPV16  
140 transcripts in these cells, as reduction of E6 and E7 levels have the potential to  
141 reactivate the p53 and pRb tumor suppressor pathways that would attenuate cellular  
142 growth. Figure 2A demonstrates that in SCC47, UMSCC104 and UMSCC152 (an  
143 HPV16+HNSCC line with a mixed population of integrated and episomal viral genomes)  
144 estrogen treatment for 7 days results in a significant reduction in viral RNA transcript  
145 levels. However, there was no significant reduction of the viral DNA levels in any of  
146 these cell lines during this treatment (Figure 2B). The results from Figures 1&2  
147 demonstrate that estrogen can selectively attenuate the growth of HPV16+HNSCC cell  
148 lines and reduce the viral transcript levels in these cells.

149 ***An HPV16 isogenic model demonstrates that the presence of HPV16 imparts ER $\alpha$***   
150 ***upregulation and estrogen sensitivity.***

151 Previously we reported on the development of an HPV16 life cycle model in N/Tert-1  
152 cells(24, 25). In N/Tert-1+HPV16 cells there is an increase in ER $\alpha$  expression over that  
153 in the parental N/Tert-1 cells (Figure 3A). The comparison between N/Tert-1 parent cells  
154 and N/Tert-1+HPV16 cells allows an isogenic comparison of their response to external  
155 reagents. Figure 3B demonstrates that control N/Tert-1 cell growth was not significantly  
156 affected by estrogen treatment over a 6-day period; in comparison, both pooled and



157 clonally generated N/Tert-1+HPV16 cells were growth attenuated with estrogen  
158 treatment (Figure 3C). We also have investigated HPV16 host gene regulation in human  
159 tonsil keratinocytes immortalized by HPV16 (HTK+HPV16) and the growth of this cell  
160 line is severely attenuated by estrogen (Figure 3D)(26). Expression of the viral RNAs  
161 were downregulated by estrogen treatment in both N/Tert-1+HPV16 and HTK+HPV16  
162 cells (Figure 3E). This is similar to the downregulation of viral RNA expression in the  
163 HPV16+HNSCC lines (Figure 2A).

164 ***Estrogen represses transcription from the HPV16 long control region (LCR).***

165 Figures 2&3 demonstrate that estrogen treatment of HPV16+ cells results in the  
166 repression of viral RNA expression. Transcription of HPV16 viral genes is regulated by  
167 the Long Control Region (HPV16-LCR), a region that is regulated by a number of host  
168 transcription factors. We constructed a reporter plasmid where luciferase gene  
169 expression is regulated by the HPV16-LCR (pHPV16-LCR-Luc), transfected this vector  
170 into C33a cells, and monitored transcription levels of the pHPV16-LCR-Luc via relative  
171 fluorescence units (RFU) in the presence or absence of estrogen. Estrogen treatment  
172 resulted in a significant reduction of luciferase expression (Figure 4A), while expression  
173 from a control luciferase plasmid (pgl3 basic) was not affected by estrogen treatment.  
174 Because of the effects observed in HeLa cells (Figure 1C), we sought to determine if  
175 the LCR repression was also observed in HPV18 used a previously described pHPV18-  
176 LCR-luc plasmid(27); similar significant repression of the HPV18-LCR was also  
177 observed (Figure 4B). We carried out similar experiments in N/Tert-1 cells where  
178 estrogen treatment also significantly reduced luciferase activity in cells transfected with  
179 pHPV16-LCR-Luc (Figure 4C), but did not reduce the control luciferase plasmid. The

180 conclusion from Figures 2-4 is that estrogen represses transcription from the HPV16  
181 long control region to downregulate expression of early viral genes.

182 ***Estrogen increases DNA damage and initiates apoptosis in some HPV+ cancer***  
183 ***cells.***

184 Downregulation of E6 and E7 expression by estrogen could result in the elevation of  
185 p53 and pRb expression (their respective tumor suppressor targets)(28–41). Previously,  
186 studies have shown that when E2 is overexpressed in HPV positive cervical cancer  
187 cells it represses transcription from the viral LCR and this repression reduces E6 and  
188 E7 levels and reactivates the p53 and pRb tumor suppressor proteins(31, 42–44, 44–  
189 50). Moreover, E2 overexpression and loss of E6/E7, results in the elevation of p53 and  
190 pRb that allows for previously observed attenuation of growth in HeLa cells(23, 31, 45,  
191 46, 48). Similarly, our studies indicate estrogen treatment represses transcription from  
192 the LCR to reduce expression of E6 and E7 levels. We therefore analyzed the protein  
193 levels of p53 and pRb in our cancer cell lines in the presence or absence of estrogen,  
194 as well as monitor  $\gamma$ H2AX as a marker for the initiation of the DNA damage  
195 response(51), and the ratio of cleaved-PARP1/PARP1 as a marker for apoptosis. These  
196 western blots are presented in Figure 5A with accompanying densitometry analysis  
197 (Figure 5B).

198 As expected, analysis of the response to estrogen in the sensitive HeLa cells revealed a  
199 significant increase in p53, pRb,  $\gamma$ H2AX, and PARP1 cleavage (Figure 5A, top panel).  
200 Confirming the previously observed increase in apoptosis following estrogen in HeLa  
201 cells(23). Furthermore, analysis in the HPV- cancer cells reveals no dramatic alterations  
202 in p53, pRb, or PARP1 cleavage; however, there is a significant increase in  $\gamma$ H2AX in

203 C33a cells (Figure 5A, middle panel). This increase in  $\gamma$ H2AX reveals that estrogen is  
204 still initiating DNA damage; however, it appears that this damage alone is not sufficient  
205 to inhibit the growth of the C33a cells. Western blot analysis of our HPV+HNSCC lines  
206 reveals a less than clear cut mechanism that allows for the reduction in cell growth  
207 observed (Figure 5A, bottom panel). While all cells exhibited an increase in  $\gamma$ H2AX and  
208 PARP1 cleavage indicating estrogen induces DNA damage that results in an increase  
209 of apoptosis, no significant alterations in pRb were observed in any of our HPV+HNSCC  
210 lines, and p53 was only significantly increased in SCC47 and UMSCC104 cells.  
211 Therefore, the reactivation of these tumor suppressors following estrogen treatment  
212 does not fully explain the attenuation of cell growth in the HPV16+ cells.

213 ***Expression of the viral oncogenes promotes delayed cell growth attenuation***  
214 ***following estrogen treatment.***

215 We next investigated whether the transcriptional reprogramming of N/Tert-1 cells carried  
216 out by HPV16 oncogenes alone could sensitize cells to estrogen and attenuate cellular  
217 growth. To do this we expressed E6 or E7 or E6+E7 in N/Tert-1 cells and further  
218 compared these cells to those expressing the full HPV16 genome (N/Tert-1+HPV16);  
219 these E6, E7, and E6+E7 cell lines were generated using retroviral delivery and have  
220 been described previously(26, 52). Figure 6A demonstrates again that in N/Tert-1  
221 control cells, estrogen treatment does not attenuate cellular growth (Figure 6Ai) but the  
222 presence of the entire HPV16 genome promotes such attenuation (Figure 6Aii). The  
223 presence of E6, E7 or E6+E7 resulted in growth attenuation following estrogen  
224 treatment (Figures 6Aiii-v), although it was not observed on day 3, instead delaying the  
225 attenuation of cell growth that was observed with the entire HPV16 genome

226 (comparison of Day 3 is normalized and presented in Figure 6B). As the expression of  
227 the E6 and E7 in panels 5Aiii-v is not driven from the viral LCR, but rather from retroviral  
228 sequences, we anticipated that the RNA levels of the oncogenes would not be regulated  
229 by estrogen. This is indeed the case; estrogen treatment did not alter E6 or E7 levels in  
230 the cells transduced with the retroviral vectors (Figure 6C). Therefore, the growth  
231 attenuation of these cells following treatment with estrogen can be contributed to the  
232 expression of the viral oncoproteins, and likely due to the transcriptional reprogramming  
233 of these cells carried out by these proteins.

#### 234 ***Estrogen and radiation treatment of HPV positive and negative cancer cells.***

235 Radiation treatment is a standard of care therapy for HPV+HNSCCs. We treated C33a,  
236 HN30 and SCC47 cells with estrogen and then treated them with 2, 5 and 10 Gy of  
237 radiation to investigate whether estrogen can promote further response to this  
238 treatment. For C33a (Figure 7A) and HN30 (Figure 7B), the presence of estrogen made  
239 no significant difference to the response to radiation treatment. For SCC47 cells,  
240 treatment with estrogen by itself attenuated cell growth, as shown in Figure 1Bi. As  
241 observed in Figure 7C, treatment with radiation did not have a dramatic effect on the  
242 growth of SCC47. However, because SCC47 cells were highly sensitive to estrogen  
243 alone, the additive effect observed with estrogen and radiation lead to ~80% loss in cell  
244 viability even at 2 Gy radiation. This is promising and suggests that estrogen treatment  
245 may provide a unique opportunity to allow for increased responsiveness to radiation  
246 treatment in the clinic at reduced radiation doses for HPV+HNSCC.

247

248

249 **Discussion**

250 While the prophylactic vaccine should decrease the incidence of HPV in the upcoming  
251 decades, we currently lack antiviral treatments to target those already infected with the  
252 virus. Likewise, HPV-related HNSCC are on the rise and this oncogenic virus has  
253 bypassed tobacco as the main carcinogen in the oropharyngeal region(3, 11, 53).  
254 Despite HPV+ and HPV- HNSCCs being very different both phenotypically and  
255 genotypically in terms of their pathological and molecular mechanisms of  
256 carcinogenesis and in their response to therapy, they are still treated the same in the  
257 clinic(54). It is therefore of particular interest to develop HPV-specific treatments for  
258 HPV+HNSCC.

259 Analysis of TCGA data showed that the expression of the estrogen receptor alpha  
260 (ER $\alpha$ ) was highly significantly upregulated in HPV16+HNSCC vs HPV- HNSCC(20, 21,  
261 24). The ER $\alpha$  also decreased as stages advance, so we initially rationalized that  
262 estrogen may play a role in the early development of cancer. This differential expression  
263 of the ER $\alpha$  presented an opportunity to exploit a significant difference between HPV+/-  
264 HNSCC and to possibly develop a specific targeted approach. Our initial hypothesis  
265 aligned with previous indications that the estrogen and the ER $\alpha$  increase the risk of  
266 cervical cancer, and we further predicted that high doses of estrogen would initiate the  
267 DNA damage response (DDR) (14–16, 18, 19, 55–58). Based on our previously  
268 published data, we further predicated that this increase in the DDR via estrogen would  
269 enhance HPV tumorigenicity and ultimately result in worse outcomes and disease  
270 progression(59). However, it soon became clear that our initial hypothesis was incorrect  
271 when HPV+ cells were specifically sensitized via estrogen treatment, while HPV- cells

272 showed little to no response. We were also extremely surprised with the dramatic  
273 response to estrogen that we observed in HeLa cells, although recently published data  
274 now confirms our observations(23). This recent study utilizing HeLa cells as a model to  
275 analyze steroid signaling confirmed these cells are particularly sensitive to estrogen. Li  
276 et al showed that estrogen induced classical caspase-3-mediated apoptosis via a multi-  
277 step molecular mechanism, however this study did not take into account the HPV status  
278 of their cell model and may have missed an underlying viral mechanism by which  
279 estrogen was able to induce the cell death they observed(23). More specifically, HeLa  
280 cells are intrinsically dependent on the expression of E6 and E7(60); if estrogen is able  
281 to reduce viral levels of these vital oncoproteins, this could contribute to the rapid death  
282 progression observed in HeLa cells, although it likely not the only mechanism.

283 While the expression of the ER $\alpha$  was found to be upregulated in HPV+HNSCC, and via  
284 HPV expression in our N/Tert-1 model, we do not believe that the overall ER $\alpha$   
285 expression level is the only reason that HPV+ cells are sensitive to estrogen. Among  
286 the cell lines we analyzed for estrogen sensitivity, the C33a cells had the highest protein  
287 level as observed by western blot (Figure 1A), yet C33a cells showed little to no cell  
288 growth response to estrogen alone (Figure 1Biii), however estrogen did increase  $\gamma$ H2AX  
289 demonstrating these cells are responsive to estrogen (Figure 5A, middle panel), while  
290 only providing moderate sensitization to irradiation (Figure 7A). It is likely that  
291 estrogen/HPV specific interactions, both via the LCR and E6/E7, are responsible for the  
292 growth inhibition and cell death we observed in our HPV+ cell lines, not from DNA  
293 damage signaling alone. Nevertheless, the HPV upregulation of ER $\alpha$  likely ensures the  
294 ability of HPV infected cells to respond to estrogen treatment. Further expanding this,

295 high expression of the ER $\alpha$  alone, as observed in C33a cells, is not enough to confer  
296 estrogen sensitivity; HPV upregulation of the ER $\alpha$  in conjunction with HPV specific  
297 estrogenic signaling, initiates a complex signaling cascade to initiate estrogen  
298 sensitivity.

299 HPV+HNSCC is most commonly associated with males, found at a 4:1 higher ratio than  
300 observed in females(61). While estrogen is typically associated with females, men do in  
301 fact express appreciable levels of the estrogen receptors and circulating estradiol levels  
302 in males are the same or higher than observed in post-menopausal women(62–65).  
303 Therefore, this could begin to explain some of the sex related differences observed in  
304 the instances of HPV+HNSCC and presents an interesting observation for future  
305 studies.

306 It isn't clear what control region in the HPV16 LCR is responsible for transcriptional  
307 repression following estrogen treatment. However, it has been shown that the ER $\alpha$  can  
308 interact with AP1 via c-Jun and there are known AP1 binding sites in the HPV16 LCR  
309 that may mediate the response of this region to estrogen(66–72). This will be  
310 investigated in future studies.

311 Future studies determining the exact mechanism of the interaction between estrogen  
312 and HPV may provide additional opportunities to provide more specific targeted  
313 approaches to exploit this HPV specific sensitization to estrogen for therapeutic gain in  
314 the treatment of HPV+cancers. Overall our results indicate that estrogen may provide  
315 an approach that could be exploited therapeutically for the treatment of HPV+ epithelial  
316 cells.

## 317 **Materials and Methods**

### 318 *Cell culture*

319 C33a (ATCC), HN30 (generous gift from Dr. Hisashi Harada, VCU Philips Institute),  
320 SCC47 (Millipore), and HeLa (generous gift from Dr. Alison McBride, NIAID) cells were  
321 grown in Dulbecco's modified Eagle's medium (Invitrogen) and supplemented with 10%  
322 charcoal stripped fetal bovine serum (Gemini Bio-products). UMSCC104 (Millipore),  
323 and UMSCC152 (ATCC) cells were grown in Eagle's Minimum Essential Medium  
324 (EMEM, Invitrogen) supplemented with non-essential amino acids (NEAA, Gibco) and  
325 10% charcoal stripped fetal bovine serum. N/Tert-1 cells and all derived cell lines, as  
326 well as HTK+HPV16 cells (a generous gift from Dr. Craig Meyers, UPenn, Hershey)  
327 have been describe previously(24, 25, 52, 59) and were maintained in keratinocyte-  
328 serum free medium (K-SFM, Invitrogen), supplemented with a 1% (vol/vol) penicillin-  
329 streptomycin mixture (ThermoFisher Scientific). All N/Tert-1 cells were also  
330 supplemented with 4 µg/ml hygromycin B (Millipore Sigma). All cells not directly  
331 purchased from providers were cell type confirmed by Johns Hopkins or MD Anderson  
332 cell line authentication services, were maintained at 37°C in a 5% CO<sub>2</sub>-95% air  
333 atmosphere, routinely passaged every 3-4 days and routinely monitored for  
334 mycoplasma.

### 335 *Trypan blue exclusion*

336 Cell supernatant was collected to allow for dead cell collection; attached cells were  
337 harvested by trypsinization and added to cell supernatant. Total cells were stained with



338 trypan blue and viable cells counted. Total number of cells was recorded and viable cell  
339 ratio was calculated.

#### 340 *Plasmids*

341 pHPV16-LCR-Luc was generated by PCR amplification of the HPV16 LCR from W12  
342 cells, introducing *KpnI* and *BglIII* restriction sites, and cloned into a pGL3 backbone  
343 (cloning primers listed below). The other plasmids utilized in these studies have been  
344 previously reported by others or used and described by this laboratory: PGL3 basic(73),  
345 pHPV18-LCR-Luc(27), HPV16 E6 (p6661 MSCV-IP N-HA only 16E6 – Addgene  
346 plasmid # 42603 Dr. Peter Howley), HPV16 E7 (p6640 MSCV-P C-FlagHA 16E7-Kozak  
347 - Addgene plasmid # 35018 – Dr. Peter Howley). HPV16 E6E7 (pLXSNE6E7  
348 Addgene#52394 – Dr. Denise Galloway)

349 *pHPV16-LCR-Luc Cloning primers* (Invitrogen): HPV16 LCR- forward 1 (position 7153)  
350 5'-TCGAGGTACCGCTGTAAGTATTGTATGT-3'; forward 2 (position 7288) 5'-  
351 TCGAGGTACCATGCTTGTGTAACTATTG-3'; forward 3 (position 7423) 5'-  
352 TCGAGGTACCGTAGCGCCAGCGGCCATT-3'; forward 4 (position 7531) 5'-  
353 TCGAGGTACCGTACGTTTCCTGCTTGCC-3'; forward 5 (position 7668) 5'-  
354 TCGAGGTACCCACTATGCGCCAACGCCT-3'; forward 6 (position 7737) 5'-  
355 TCGAGGTACCGCATATTTGGCATAAGGT-3'; forward 7 (position 7873) 5'-  
356 TCGAGGTACCCACATTTACAAGCAACTT-3'; reverse (position 94) 5'-  
357 TCGAAGATCTIGGGTCCTGAAACACTGCAGTTCTT-3'.

#### 358 *Transfection Assays and Transcriptional Activity*

359 Note cells were plated at  $5 \times 10^5$  in 100-mm dishes. The following day, plasmid DNA  
360 was transfected using the calcium phosphate method for C33a. N/Tert-1 cells were  
361 transfected utilizing lipofectamine 2000 (according to manufacturer's instructions,  
362 ThermoFisher Scientific). 24-hours post transfection cells were washed and noted cells  
363 were supplemented with  $15\mu\text{M}$   $17\beta$ -estradiol. 48-hours post transfection, cells were  
364 harvested utilizing Promega Reporter Lysis Buffer and analyzed for luciferase using the  
365 Promega Luciferase Assay System. Concentrations were normalized to protein levels,  
366 as measured by the BioRad Protein Assay Dye, and relative fluorescence units were  
367 measured using the BioTek Synergy H1 Hybrid Reader. Experiments were performed in  
368 triplicate.

#### 369 *Western blots*

370 Cells were trypsinized, washed twice with phosphate buffered saline (PBS), pelleted,  
371 then re-suspended in 200  $\mu\text{l}$  of lysis buffer (0.5% Nonidet P-40, 50 mM Tris, pH 7.8,  
372 150 mM NaCl) supplemented with a protease inhibitor mixture (Roche Molecular  
373 Biochemicals). The cell and lysis buffer mixture was incubated on ice for 30 min,  
374 centrifuged for 10 min at 18,000g at 4 °C, and supernatant was collected. Protein levels  
375 were determined utilizing the Bio-rad protein assay (Bio-rad). Equal amounts of protein  
376 were boiled in 4x Laemmli sample buffer (Bio-rad). Samples were then loaded onto a 4–  
377 12% gradient gel (Invitrogen), ran at 120 V for ~2 h and transferred at 100 V for 1 h onto  
378 nitrocellulose membranes (Bio-rad) using the wet blot method. The membrane was then  
379 blocked in Odyssey blocking buffer (diluted 1:1 with PBS), at room temperature for 1 h.  
380 After blocking, the membrane was probed with noted antibodies diluted in blocking  
381 buffer, and incubated O/N at 4 °C: p-histone H2A.X Rabbit 1:1000 (Cell Signaling

382 #9718S),  $\beta$ -actin Mouse 1:2000 (Santa Cruz sc-81178), ER $\alpha$  Rabbit 1:1000 (AbCam  
383 ab32063), p53 Mouse 1:1000 (Cell Signaling 2524S), pRb Mouse 1:1000 (Cell  
384 Signaling 9309S), PARP1 Mouse 1:1000 (SantaCruz sc-8007), cleaved-PARP1 Rabbit  
385 1:1000 (Cell Signaling 9541S). Following incubation with primary antibody, the  
386 membrane was washed with 0.01% PBS-Tween wash buffer before probing with  
387 Odyssey secondary antibody diluted 1:20,000, Goat anti-mouse IRdye 800 cw, Goat  
388 anti-rabbit IRdye680cw for one hour at room temperature. The membrane was then  
389 washed in 0.01% PBS-tween before infrared scanning using the Odyssey Li-Cor  
390 imaging system, also used to perform densitometry analysis. Experiments were  
391 performed in triplicate.

#### 392 *SYBR green qRT-PCR*

393  
394 At the time of harvest, cells were washed twice with phosphate buffered saline (PBS).  
395 RNA was immediately isolated using the SV Total RNA Isolation System (Promega)  
396 following the manufacturer's instructions. Two micrograms of RNA were reverse  
397 transcribed into cDNA using the High Capacity Reverse Transcription Kit (Applied  
398 Biosystems). cDNA and relevant primers were added to PowerUp SYBR Green Master  
399 Mix (Applied Biosystems) and real-time PCR performed using 7500 Fast Real-Time  
400 PCR System (Applied Biosystems). Results shown are the average of three  
401 independent experiments with relative quantity of genes determined by the  $\Delta\Delta C_t$   
402 method normalized to the endogenous control gene GAPDH.

403 *Primers* (Invitrogen): GAPDH 5'-GGAGCGAGATCCCTCCAAAAT-3' (forward) and 5'-  
404 GGCTGTTGTCATACTTCTCATGG-3'. E2 5'- TGGAAGTGCAGTTTGATGGA -3'

405 (forward) and 5'- CCGCATGAACTTCCCATACT-3' (reverse). E4 5'-  
406 GGCACCGAAGAAACACAGAC-3' (forward) and 5'-AATCCGTCCTTTGTGTGAGC-3'  
407 (reverse). E5 5'-CACAACATTACTGGCGTGCT-3' (forward) and 5'-  
408 ACCTAAACGCAGAGGCTGCT-3' (reverse). E6 5'-AATGTTTCAGGACCCACAGG-3'  
409 (forward) and 5'-GCATAAATCCCGAAAAGCAA-3' (reverse). E7 5'-  
410 CCGGACAGAGCCCATTACAAT-3' (forward) and 5'-ACGTGTGTGCTTTGTACGCAC-  
411 3' (reverse).

#### 412 *CellTiter-Glo protocol for measuring cellular ATP*

413 2000 cells were plated in 200uL media in clear bottom black 96-well plates (Greiner Bio  
414 One, 655090). The following day, media was removed from cells and replaced with  
415 200uL media containing 17 $\beta$ -Estradiol at differing concentrations. Cells were then  
416 incubated for 48-hours. Afterwards, 25uL of reconstituted CellTiter-Glo Luminescent  
417 Cell Viability reagent was added to each well and incubated for 5 minutes (Promega,  
418 G7571). Luminescence readings were taken using the BioTek Synergy H1 Hybrid  
419 Reader. Viability percentages were calculated by normalizing to DMSO treated cell  
420 readings utilizing media only wells for blanking. DMSO wells were normalized to 100%.

#### 421 *Radiation*

422 Noted cells were exposed to  $\gamma$ -IR using a <sup>137</sup>Cs irradiator. Radiation treatment consisted  
423 of a single dose of irradiation at 2, 5, or 10 Gy. In our studies, cells were exposed to  
424 estrogen for 72 hours before irradiation. Post-irradiation, cells were washed once with  
425 PBS and medium replaced. Estrogen was then maintained on noted cells for an  
426 additional 72 hours before cells were trypsinized and counted for cell viability.

427 **References**

- 428 1. Chesson HW, Dunne EF, Hariri S, Markowitz LE. 2014. The estimated lifetime  
429 probability of acquiring human papillomavirus in the United States. *Sex Transm Dis*  
430 41:660–664.
- 431 2. Brianti P, De Flaminio E, Mercuri SR. 2017. Review of HPV-related diseases  
432 and cancers. *New Microbiol* 40:80–85.
- 433 3. de Martel C, Plummer M, Vignat J, Franceschi S. 2017. Worldwide burden of  
434 cancer attributable to HPV by site, country and HPV type. *Int J Cancer* 141:664–  
435 670.
- 436 4. Kang SD, Chatterjee S, Alam S, Salzberg AC, Milici J, van der Burg SH, Meyers C.  
437 2018. Effect of Productive Human Papillomavirus 16 Infection on Global Gene  
438 Expression in Cervical Epithelium. *J Virol* 92.
- 439 5. McLaughlin-Drubin ME, Meyers C. 2004. Evidence for the coexistence of two  
440 genital HPV types within the same host cell in vitro. *Virology* 321:173–180.
- 441 6. McLaughlin-Drubin ME, Münger K. 2009. Oncogenic activities of human  
442 papillomaviruses. *Virus Res* 143:195–208.
- 443 7. McLaughlin-Drubin ME, Meyers J, Munger K. 2012. Cancer associated human  
444 papillomaviruses. *Curr Opin Virol* 2:459–466.
- 445 8. McBride AA, Münger K. 2018. Expert Views on HPV Infection. *Viruses* 10.

- 446 9. zur Hausen H. 2009. Papillomaviruses in the causation of human cancers - a brief  
447 historical account. *Virology* 384:260–265.
- 448 10. Psyrrri A, DiMaio D. 2008. Human papillomavirus in cervical and head-and-neck  
449 cancer. *Nat Clin Pract Oncol* 5:24–31.
- 450 11. Marur S, D'Souza G, Westra WH, Forastiere AA. 2010. HPV-associated head and  
451 neck cancer: a virus-related cancer epidemic. *Lancet Oncol* 11:781–789.
- 452 12. Hoover RN, Hyer M, Pfeiffer RM, Adam E, Bond B, Cheville AL, Colton T, Hartge  
453 P, Hatch EE, Herbst AL, Karlan BY, Kaufman R, Noller KL, Palmer JR, Robboy SJ,  
454 Saal RC, Strohsnitter W, Titus-Ernstoff L, Troisi R. 2011. Adverse health outcomes  
455 in women exposed in utero to diethylstilbestrol. *N Engl J Med* 365:1304–1314.
- 456 13. Reddel RR, Sutherland RL. 1987. Effects of pharmacological concentrations of  
457 estrogens on proliferation and cell cycle kinetics of human breast cancer cell lines  
458 in vitro. *Cancer Res* 47:5323–5329.
- 459 14. Chung S-H, Franceschi S, Lambert PF. 2010. Estrogen and ER $\alpha$ : Culprits in  
460 Cervical Cancer? *Trends Endocrinol Metab* TEM 21:504–511.
- 461 15. Chung S-H, Wiedmeyer K, Shai A, Korach KS, Lambert PF. 2008. Requirement for  
462 Estrogen Receptor Alpha in a Mouse Model for Human Papillomavirus-Associated  
463 Cervical Cancer. *Cancer Res* 68:9928–9934.

- 464 16. Son J, Park JW, Lambert PF, Chung S-H. 2014. Requirement of estrogen receptor  
465 alpha DNA-binding domain for HPV oncogene-induced cervical carcinogenesis in  
466 mice. *Carcinogenesis* 35:489–496.
- 467 17. Munger K. 2014. Are selective estrogen receptor modulators (SERMs) a  
468 therapeutic option for HPV-associated cervical lesions and cancers? *Am J Pathol*  
469 184:358–361.
- 470 18. Riley RR, Duensing S, Brake T, Münger K, Lambert PF, Arbeit JM. 2003.  
471 Dissection of Human Papillomavirus E6 and E7 Function in Transgenic Mouse  
472 Models of Cervical Carcinogenesis. *Cancer Res* 63:4862–4871.
- 473 19. Jabbar SF, Abrams L, Glick A, Lambert PF. 2009. Persistence of high-grade  
474 cervical dysplasia and cervical cancer requires the continuous expression of the  
475 human papillomavirus type 16 E7 oncogene. *Cancer Res* 69:4407–4414.
- 476 20. Kano M, Kondo S, Wakisaka N, Wakae K, Aga M, Moriyama-Kita M, Ishikawa K,  
477 Ueno T, Nakanishi Y, Hatano M, Endo K, Sugimoto H, Kitamura K, Muramatsu M,  
478 Yoshizaki T. 2019. Expression of estrogen receptor alpha is associated with  
479 pathogenesis and prognosis of human papillomavirus-positive oropharyngeal  
480 cancer. *Int J Cancer* 145:1547–1557.
- 481 21. Koenigs MB, Lefranc-Torres A, Bonilla-Velez J, Patel KB, Hayes DN, Glomski K,  
482 Busse PM, Chan AW, Clark JR, Deschler DG, Emerick KS, Hammon RJ, Wirth LJ,  
483 Lin DT, Mroz EA, Faquin WC, Rocco JW. 2019. Association of Estrogen Receptor

- 484           Alpha Expression With Survival in Oropharyngeal Cancer Following  
485           Chemoradiation Therapy. *J Natl Cancer Inst.*
- 486   22. Lamb HM, Hardwick JM. 2019. The Dark Side of Estrogen Stops Translation to  
487           Induce Apoptosis. *Mol Cell* 75:1087–1089.
- 488   23. Li D, Chen J, Ai Y, Gu X, Li L, Che D, Jiang Z, Li L, Chen S, Huang H, Wang J, Cai  
489           T, Cao Y, Qi X, Wang X. 2019. Estrogen-Related Hormones Induce Apoptosis by  
490           Stabilizing Schlafen-12 Protein Turnover. *Mol Cell* 75:1103-1116.e9.
- 491   24. Nulton TJ, Olex AL, Dozmorov M, Morgan IM, Windle B. 2017. Analysis of The  
492           Cancer Genome Atlas sequencing data reveals novel properties of the human  
493           papillomavirus 16 genome in head and neck squamous cell carcinoma. *Oncotarget*  
494           8:17684–17699.
- 495   25. Evans MR, James CD, Loughran O, Nulton TJ, Wang X, Bristol ML, Windle B,  
496           Morgan IM. 2017. An oral keratinocyte life cycle model identifies novel host  
497           genome regulation by human papillomavirus 16 relevant to HPV positive head and  
498           neck cancer. *Oncotarget* 8:81892–81909.
- 499   26. Evans MR, Fontan CT, James CD, Wang X, Morgan IM, Bristol ML. 2019. A head  
500           and neck squamous cell carcinoma model to study and target HPV replication and  
501           transcription. *Viruses* Under Review.
- 502   27. Gauson EJ, Donaldson MM, Dornan ES, Wang X, Bristol M, Bodily JM, Morgan IM.  
503           2015. Evidence supporting a role for TopBP1 and Brd4 in the initiation but not



- 504 continuation of human papillomavirus 16 E1/E2-mediated DNA replication. *J Virol*  
505 89:4980–4991.
- 506 28. Butz K, Denk C, Ullmann A, Scheffner M, Hoppe-Seyler F. 2000. Induction of  
507 apoptosis in human papillomaviruspositive cancer cells by peptide aptamers  
508 targeting the viral E6 oncoprotein. *Proc Natl Acad Sci* 97:6693–6697.
- 509 29. Butz K, Ristriani T, Hengstermann A, Denk C, Scheffner M, Hoppe-Seyler F. 2003.  
510 siRNA targeting of the viral E6 oncogene efficiently kills human papillomavirus-  
511 positive cancer cells. *Oncogene* 22:5938–5945.
- 512 30. Hoppe-Seyler K, Bossler F, Braun JA, Herrmann AL, Hoppe-Seyler F. 2018. The  
513 HPV E6/E7 Oncogenes: Key Factors for Viral Carcinogenesis and Therapeutic  
514 Targets. *Trends Microbiol* 26:158–168.
- 515 31. DeFilippis RA, Goodwin EC, Wu L, DiMaio D. 2003. Endogenous human  
516 papillomavirus E6 and E7 proteins differentially regulate proliferation, senescence,  
517 and apoptosis in HeLa cervical carcinoma cells. *J Virol* 77:1551–1563.
- 518 32. Hatterschide J, Bohidar AE, Grace M, Nulton TJ, Kim HW, Windle B, Morgan IM,  
519 Munger K, White EA. 2019. PTPN14 degradation by high-risk human  
520 papillomavirus E7 limits keratinocyte differentiation and contributes to HPV-  
521 mediated oncogenesis. *Proc Natl Acad Sci U S A* 116:7033–7042.
- 522 33. Gaglia MM, Munger K. 2018. More than just oncogenes: mechanisms of  
523 tumorigenesis by human viruses. *Curr Opin Virol* 32:48–59.

- 524 34. Chiang C, Pauli E-K, Biryukov J, Feister KF, Meng M, White EA, Münger K, Howley  
525 PM, Meyers C, Gack MU. 2018. The Human Papillomavirus E6 Oncoprotein  
526 Targets USP15 and TRIM25 To Suppress RIG-I-Mediated Innate Immune  
527 Signaling. *J Virol* 92.
- 528 35. Harden ME, Munger K. 2017. Human papillomavirus 16 E6 and E7 oncoprotein  
529 expression alters microRNA expression in extracellular vesicles. *Virology* 508:63–  
530 69.
- 531 36. White EA, Sowa ME, Tan MJA, Jeudy S, Hayes SD, Santha S, Münger K, Harper  
532 JW, Howley PM. 2012. Systematic identification of interactions between host cell  
533 proteins and E7 oncoproteins from diverse human papillomaviruses. *Proc Natl*  
534 *Acad Sci U S A* 109:E260-267.
- 535 37. White EA, Münger K, Howley PM. 2016. High-Risk Human Papillomavirus E7  
536 Proteins Target PTPN14 for Degradation. *mBio* 7.
- 537 38. Spangle JM, Munger K. 2013. The HPV16 E6 oncoprotein causes prolonged  
538 receptor protein tyrosine kinase signaling and enhances internalization of  
539 phosphorylated receptor species. *PLoS Pathog* 9:e1003237.
- 540 39. Sitz J, Blanchet SA, Gameiro SF, Biquand E, Morgan TM, Galloy M, Dessapt J,  
541 Lavoie EG, Blondeau A, Smith BC, Mymryk JS, Moody CA, Fradet-Turcotte A.  
542 2019. Human papillomavirus E7 oncoprotein targets RNF168 to hijack the host  
543 DNA damage response. *Proc Natl Acad Sci U S A* 116:19552–19562.

- 544 40. Moody CA, Laimins LA. 2010. Human papillomavirus oncoproteins: pathways to  
545 transformation. *Nat Rev Cancer* 10:550–560.
- 546 41. McBride AA. 2017. Oncogenic human papillomaviruses. *Philos Trans R Soc Lond*  
547 *B Biol Sci* 372.
- 548 42. Morrison MA, Morreale RJ, Akunuru S, Kofron M, Zheng Y, Wells SI. 2011.  
549 Targeting the Human Papillomavirus E6 and E7 Oncogenes through Expression of  
550 the Bovine Papillomavirus Type 1 E2 Protein Stimulates Cellular Motility. *J Virol*  
551 85:10487–10498.
- 552 43. Francis DA, Schmid SI, Howley PM. 2000. Repression of the integrated  
553 papillomavirus E6/E7 promoter is required for growth suppression of cervical  
554 cancer cells. *J Virol* 74:2679–2686.
- 555 44. Nishimura A, Ono T, Ishimoto A, Dowhanick JJ, Frizzell MA, Howley PM, Sakai H.  
556 2000. Mechanisms of Human Papillomavirus E2-Mediated Repression of Viral  
557 Oncogene Expression and Cervical Cancer Cell Growth Inhibition. *J Virol* 74:3752–  
558 3760.
- 559 45. Horner SM, DiMaio D. 2007. The DNA binding domain of a papillomavirus E2  
560 protein programs a chimeric nuclease to cleave integrated human papillomavirus  
561 DNA in HeLa cervical carcinoma cells. *J Virol* 81:6254–6264.
- 562 46. Goodwin EC, DiMaio D. 2000. Repression of human papillomavirus oncogenes in  
563 HeLa cervical carcinoma cells causes the orderly reactivation of dormant tumor  
564 suppressor pathways. *Proc Natl Acad Sci U S A* 97:12513–12518.

- 565 47. Wu L, Goodwin EC, Naeger LK, Vigo E, Galaktionov K, Helin K, DiMaio D. 2000.  
566 E2F-Rb complexes assemble and inhibit cdc25A transcription in cervical carcinoma  
567 cells following repression of human papillomavirus oncogene expression. *Mol Cell*  
568 *Biol* 20:7059–7067.
- 569 48. Hwang ES, Naeger LK, DiMaio D. 1996. Activation of the endogenous p53 growth  
570 inhibitory pathway in HeLa cervical carcinoma cells by expression of the bovine  
571 papillomavirus E2 gene. *Oncogene* 12:795–803.
- 572 49. Ottinger M, Smith JA, Schweiger M-R, Robbins D, Powell MLC, You J, Howley PM.  
573 2009. Cell-type specific transcriptional activities among different papillomavirus  
574 long control regions and their regulation by E2. *Virology* 395:161–171.
- 575 50. McBride AA. 2013. The papillomavirus E2 proteins. *Virology* 445:57–79.
- 576 51. Anacker DC, Moody CA. 2017. Modulation of the DNA damage response during  
577 the life cycle of human papillomaviruses. *Virus Res* 231:41–49.
- 578 52. James CD, Fontan CT, Otoa R, Das D, Prabhakar AT, Wang X, Bristol ML, Morgan  
579 IM. 2020. Human Papillomavirus 16 E6 and E7 Synergistically Repress Innate  
580 Immune Gene Transcription. *mSphere* 5.
- 581 53. Burd EM. 2003. Human Papillomavirus and Cervical Cancer. *Clin Microbiol Rev*  
582 16:1–17.
- 583 54. Lowy DR, Munger K. 2010. Prognostic implications of HPV in oropharyngeal  
584 cancer. *N Engl J Med* 363:82–84.

- 585 55. Yager JD. 2015. Mechanisms of estrogen carcinogenesis: The role of E2/E1-  
586 quinone metabolites suggests new approaches to preventive intervention--A  
587 review. *Steroids* 99:56–60.
- 588 56. Alayev A, Salamon RS, Manna S, Schwartz NS, Berman AY, Holz MK. 2016.  
589 Estrogen induces RAD51C expression and localization to sites of DNA damage.  
590 *Cell Cycle Georget Tex* 15:3230–3239.
- 591 57. Williamson LM, Lees-Miller SP. 2011. Estrogen receptor  $\alpha$ -mediated transcription  
592 induces cell cycle-dependent DNA double-strand breaks. *Carcinogenesis* 32:279–  
593 285.
- 594 58. Stork CT, Bocek M, Crossley MP, Sollier J, Sanz LA, Chédin F, Swigut T, Cimprich  
595 KA. 2016. Co-transcriptional R-loops are the main cause of estrogen-induced DNA  
596 damage. *eLife* 5.
- 597 59. Bristol ML, Wang X, Smith NW, Son MP, Evans MR, Morgan IM. 2016. DNA  
598 Damage Reduces the Quality, but Not the Quantity of Human Papillomavirus 16 E1  
599 and E2 DNA Replication. *Viruses* 8.
- 600 60. Nishimura A, Nakahara T, Ueno T, Sasaki K, Yoshida S, Kyo S, Howley PM, Sakai  
601 H. 2006. Requirement of E7 oncoprotein for viability of HeLa cells. *Microbes Infect*  
602 8:984–993.
- 603 61. 2019. HPV-Associated Oropharyngeal Cancer Rates by Race and Ethnicity | CDC.

- 604 62. Mathews L, Subramanya V, Zhao D, Ouyang P, Vaidya D, Guallar E, Yeboah J,  
605 Herrington D, Hays AG, Budoff MJ, Michos ED. 2019. Endogenous Sex Hormones  
606 and Endothelial Function in Postmenopausal Women and Men: The Multi-Ethnic  
607 Study of Atherosclerosis. *J Womens Health* 2002 28:900–909.
- 608 63. Ding EL, Song Y, Malik VS, Liu S. 2006. Sex differences of endogenous sex  
609 hormones and risk of type 2 diabetes: a systematic review and meta-analysis.  
610 *JAMA* 295:1288–1299.
- 611 64. Stanhewicz AE, Wenner MM, Stachenfeld NS. 2018. Sex differences in endothelial  
612 function important to vascular health and overall cardiovascular disease risk across  
613 the lifespan. *Am J Physiol Heart Circ Physiol* 315:H1569–H1588.
- 614 65. 2019. Estradiol and Estrogen Levels. News-Medicalnet.
- 615 66. Villanueva R, Morales-Peza N, Castelán-Sánchez I, García-Villa E, Tapia R, Cid-  
616 Arregui A, García-Carrancá A, López-Bayghen E, Gariglio P. 2006. Heparin (GAG-  
617 hed) inhibits LCR activity of human papillomavirus type 18 by decreasing AP1  
618 binding. *BMC Cancer* 6:218.
- 619 67. Demeret C, Le Moal M, Yaniv M, Thierry F. 1995. Control of HPV 18 DNA  
620 replication by cellular and viral transcription factors. *Nucleic Acids Res* 23:4777–  
621 4784.
- 622 68. Velazquez Torres A, Gariglio Vidal P. 2002. [Possible role of transcription factor  
623 AP1 in the tissue-specific regulation of human papillomavirus]. *Rev Investig Clin*  
624 *Organo Hosp Enfermedades Nutr* 54:231–242.

- 625 69. Ghosh S, Wu Y, Li R, Hu Y. 2005. Jun proteins modulate the ovary-specific  
626 promoter of aromatase gene in ovarian granulosa cells via a cAMP-responsive  
627 element. *Oncogene* 24:2236–2246.
- 628 70. Smith LM, Wise SC, Hendricks DT, Sabichi AL, Bos T, Reddy P, Brown PH, Birrer  
629 MJ. 1999. cJun overexpression in MCF-7 breast cancer cells produces a  
630 tumorigenic, invasive and hormone resistant phenotype. *Oncogene* 18:6063–6070.
- 631 71. Doucas V, Yaniv M. 1991. [Functional interaction between estrogen receptor and  
632 proto-oncogene products c-Jun and c-Fos]. *C R Seances Soc Biol Fil* 185:464–  
633 474.
- 634 72. Rani A, Stebbing J, Giamas G, Murphy J. 2019. Endocrine Resistance in Hormone  
635 Receptor Positive Breast Cancer–From Mechanism to Therapy. *Front Endocrinol*  
636 10.
- 637 73. Vance KW, Campo MS, Morgan IM. 2001. A Novel Silencer Element in the Bovine  
638 Papillomavirus Type 4 Promoter Represses the Transcriptional Response to  
639 Papillomavirus E2 Protein. *J Virol* 75:2829–2838.

640

## 641 **Figure Legends**

642 **Figure 1. Estrogen attenuates the growth of HPV+ cancer cell lines.** A) Cervical  
643 cancer cell lines HeLa and C33a, as well as HNSCC cell lines SCC47, UMSCC104,  
644 UMSCC152, and HN30 were analyzed for their expression of the ER $\alpha$  and compared to  
645 the loading control  $\beta$ -actin. HPV status is indicated above the blots. Experiments were

646 conducted in triplicate and no significant correlation between HPV status and ER $\alpha$   
647 expression was observed. **B)** HPV+ SCC47 **(i)** and UMSCC104 cells **(ii)**, and HPV-  
648 C33a **(iii)** and HN30 **(iv)** were seeded on day zero and grown in the presence or  
649 absence of 15 $\mu$ M estrogen. Cells were trypsinized and counted on day 3 and day 6 and  
650 cell counts are presented on a logarithmic scale. Statistical differences in both SCC47  
651 and UMSCC104 cell can be observed at both day 3 and day 6. \* $p < 0.05$  \*\* $p < 0.001$ . No  
652 statistical difference is observed between treatments on day 3 or day 6 in C33a **(iii)** or  
653 HN30 cells **(iv)**. Experiments were conducted in triplicate and error bars are  
654 representative of SE. **C) (i)** HeLa cells were grown in the presence or absence of 15 $\mu$ M  
655 estrogen for 72 hours then cells were counted for viability via trypan blue exclusion. **(ii)**  
656 Data is presented as % viability at 48 hours as measured by luciferase to monitor ATP  
657 via the Promega Cell Titer-Glo assay, over DMSO control. Experiments were conducted  
658 in triplicate and error bars are representative of SE. \*\* $p < 0.001$  \*\* $p < 0.001$ .

659 **Figure 2: Estrogen significantly represses RNA expression of HPV16 early genes.**

660 **A)** SCC47, UMSCC104, and UMSCC152 cells were grown in the presence or absence  
661 of 15 $\mu$ M estrogen for 7 days. Cells were then harvested and RNA expression levels  
662 were monitored via qPCR for E2, E4, E5, E6 and E7, and compared to the loading  
663 control GAPDH. Data is presented as fold repression calculated from  $\Delta\Delta$ CT calculated  
664 from the comparison of levels observed in control cells and further compared to GAPDH  
665 levels. **B)** Cells were treated as in A and DNA levels of E2, E4, E5, E6 and E7 levels  
666 were monitored via qPCR. Data is presented as fold repression calculated from  $\Delta\Delta$ CT  
667 calculated from the comparison of levels observed in control cells and further compared  
668 to GAPDH levels. No significant DNA changes were observed in any of the cell lines



669 and UMSCC104 is presented as representative data. Experiments were conducted in  
670 triplicate and error bars are representative of SE.

671 **Figure 3: HPV16 confers estrogen sensitivity onto N/Tert-1 cells.** **A)** Parental  
672 N/Tert-1 cell lines and our clonal N/Tert-1+HPV16 cells lines were analyzed for their  
673 overall ER $\alpha$  expression levels and compared to the loading control  $\beta$ -actin. **B-D)** N/Tert-  
674 **1 (B)**, N/Tert-1+HPV16 (pool and clonal) (**C**), and HTK+HPV16 (**D**) cells were seeded  
675 on day zero and grown in the presence or absence of 15 $\mu$ M estrogen. Cells were  
676 trypsinized and counted on day 3 and day 6 and cell counts are presented on a  
677 logarithmic scale. Statistical differences can be observed at both day 3 and day 6 in all  
678 lines except the parental N/Tert-1 cells. \*\*p<0.001 \*\*\*p,0.0001. Experiments were  
679 conducted in triplicate and error bars are representative of SE. **E)** Pooled N/Tert-  
680 1+HPV16, clonal N/Tert-1+HPV16, and pooled HTK+HPV16 cells were grown in the  
681 presence or absence of 15 $\mu$ M estrogen for 7 days. Cells were then harvested and RNA  
682 expression levels were monitored via qPCR for E2, E4, E5, E6 and E7, and compared  
683 to the loading control GAPDH. Data is presented as fold repression calculated from  
684  $\Delta\Delta$ CT calculated from the comparison of levels observed in control cells and further  
685 compared to GAPDH levels. Experiments were conducted in triplicate and error bars  
686 are representative of SE.

687 **Figure 4: Estrogen significantly represses HPV16 and HPV18 LCR transcription.**  
688 **A)** C33a cells were transfected with 1 $\mu$ g of pgl3 basic backbone (control), 1 $\mu$ g 16LCR-  
689 pGL3, or in **B)** 1 $\mu$ g 18-LCR-pGL3 and grown in the presence or absence of 15 $\mu$ M  
690 estrogen. **C)** N/Tert-1 cells were transfected with 1 $\mu$ g of pgl3 basic backbone, or 1 $\mu$ g  
691 16LCR-pGL3 and grown in the presence or absence of 15 $\mu$ M estrogen. Forty-eight

692 hours post transfection, a luciferase-based assay was utilized to monitor levels of LCR  
693 transcription. Data is presented as RFU, normalized to total protein concentration as  
694 monitored by a standard BSA assay. \*\*p<0.001 \*\*\*p<0.0001

695 **Figure 5: Estrogen alteration of protein expression in cancer cell lines. A)**

696 HPV18+ HeLa (top panel), HPV- C33a and HN30 (middle panel), and HPV16+ SCC47,  
697 UMSCC104, and UMSCC152 cells (bottom panel) were grown in the presence or  
698 absence of 15µM estrogen for 48 hours. Cells were then lysed and analyzed via  
699 western blot for PARP1, cleaved-PARP1, p53, pRb, and γh2AX. β-actin was used as a  
700 loading control. **B)** Densitometry analysis was compared from three independent  
701 experiments. For PARP1 the ratio of cleaved to non-cleaved PARP1 is given and the  
702 rest are presented in graphs as percent of control cells. All are normalized to loading  
703 control, and are in log scale.

704 **Figure 6: E6 and E7 expression by themselves sensitizes N/Tert-1 cells to**

705 **estrogen.** **A** (i) N/Tert-1, (ii) N/Tert-1+HPV16, (iii) N/Tert-1+E6, (iv) N/Tert-1+E7, and  
706 (v) N/Tert-1+E6E7 cells were seeded on day zero and grown in the presence or  
707 absence of estrogen. Cells were trypsinized and counted on day 3 and day 6 and cell  
708 counts are presented on a logarithmic scale. Statistical differences can be observed at  
709 both day 3 and day 6 (ii), but only on day 6 in (iii-v) \*p<0.05 \*\*p<0.001. **B).** Day 3 cell  
710 counts are compared as percent of control and normalized, only N/Tert-1+HPV16  
711 presents statistical difference at this time point. \*\*p<0.001. **C)** N/Tert-1+E6, N/Tert-  
712 1+E7, and N/Tert-1+E6E7 cells were analyzed for their RNA expression levels of E6  
713 and E7, and compared to the loading control GAPDH. Data is presented as fold  
714 expression as calculated from  $\Delta\Delta CT$  calculated from the comparison of levels observed

715 in control cells and further compared to GAPDH levels. No statistical differences were  
716 found.

717 **Figure 7: Estrogen enhances the response to radiation in SCC47 cells but not in**  
718 **C33a or HN30 cells.** A) C33a B) HN30, and C) SCC47 cells were maintained in  
719 estrogen for 72 hours. Noted cells were then radiated with 2, 5, or 10 Gy radiation, and  
720 cells were trypsinized and counted by trypan blue exclusion for viability 72-hours post-  
721 irradiation. Data is presented as % viability compared with untreated control cells.  
722 Experiments were conducted in triplicate and error bars are representative of SE.  
723 \*\* $p < 0.001$ .

#### 724 **Acknowledgments**

725 This work was supported by the VCU Philips Institute for Oral Health Research and the  
726 National Cancer Institute Designated Massey Cancer Center grant P30 CA016059.

1A

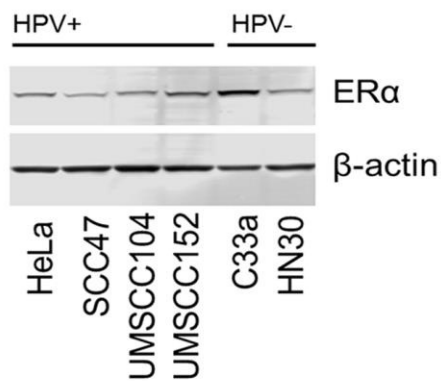

1B

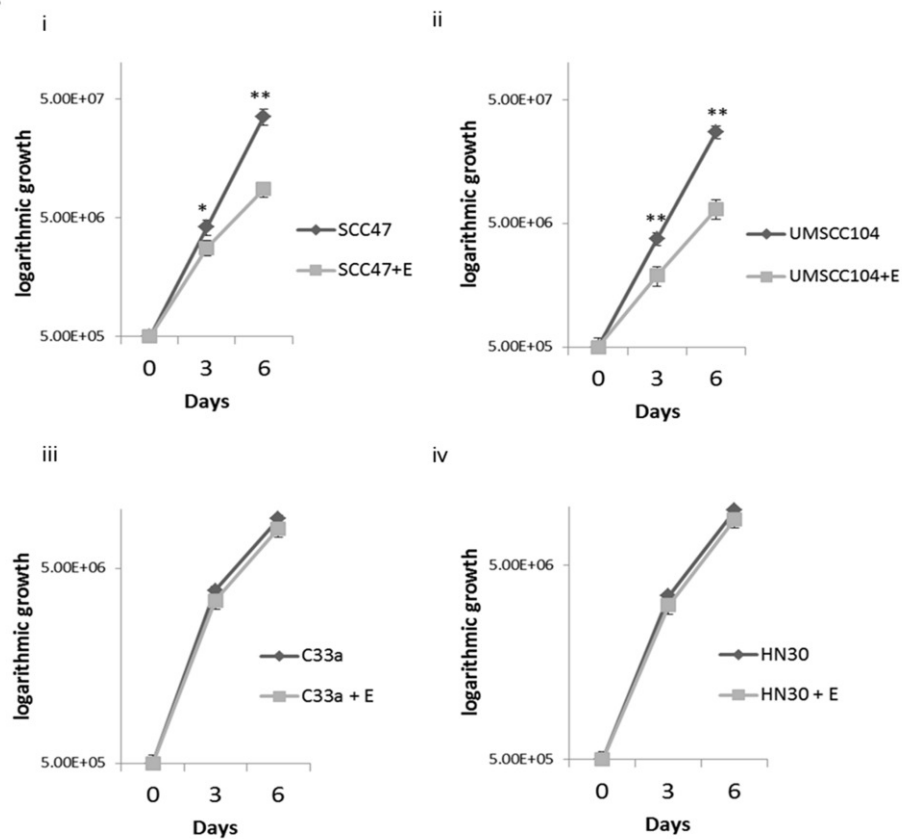

1C

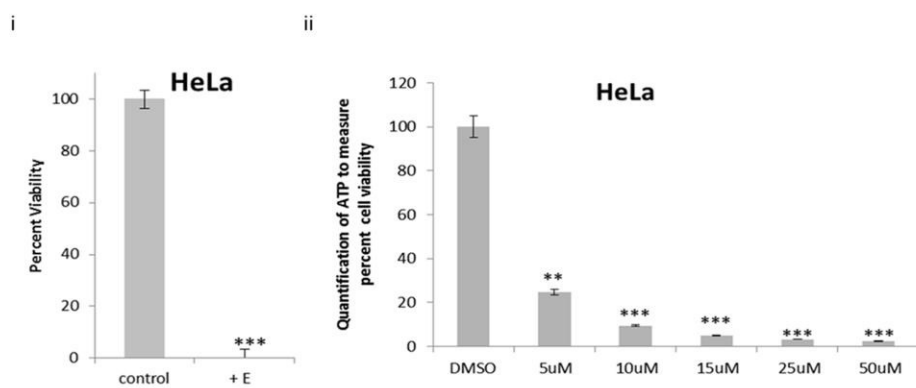

**Figure 1. Estrogen attenuates the growth of HPV+ cancer cell lines.** **A)** Cervical cancer cell lines HeLa and C33a, as well as HNSCC cell lines SCC47, UMSCC104, UMSCC152, and HN30 were analyzed for their expression of the ER $\alpha$  and compared to the loading control  $\beta$ -actin. HPV status is indicated above the blots. Experiments were conducted in triplicate and no significant correlation between HPV status and ER $\alpha$  expression was observed. **B)** HPV+ SCC47 **(i)** and UMSCC104 cells **(ii)**, and HPV- C33a **(iii)** and HN30 **(iv)** were seeded on day zero and grown in the presence or absence of 15 $\mu$ M estrogen. Cells were trypsinized and counted on day 3 and day 6 and cell counts are presented on a logarithmic scale. Statistical differences in both SCC47 and UMSCC104 cell can be observed at both day 3 and day 6. \* $p < 0.05$  \*\* $p < 0.001$ . No statistical difference is observed between treatments on day 3 or day 6 in C33a **(iii)** or HN30 cells **(iv)**. Experiments were conducted in triplicate and error bars are representative of SE. **C)** **(i)** HeLa cells were grown in the presence or absence of 15 $\mu$ M estrogen for 72 hours then cells were counted for viability via trypan blue exclusion. **(ii)** Data is presented as % viability at 48 hours as measured by luciferase to monitor ATP via the Promega Cell Titer-Glo assay, over DMSO control. Experiments were conducted in triplicate and error bars are representative of SE. \*\* $p < 0.001$  \*\* $p < 0.001$ .

2A

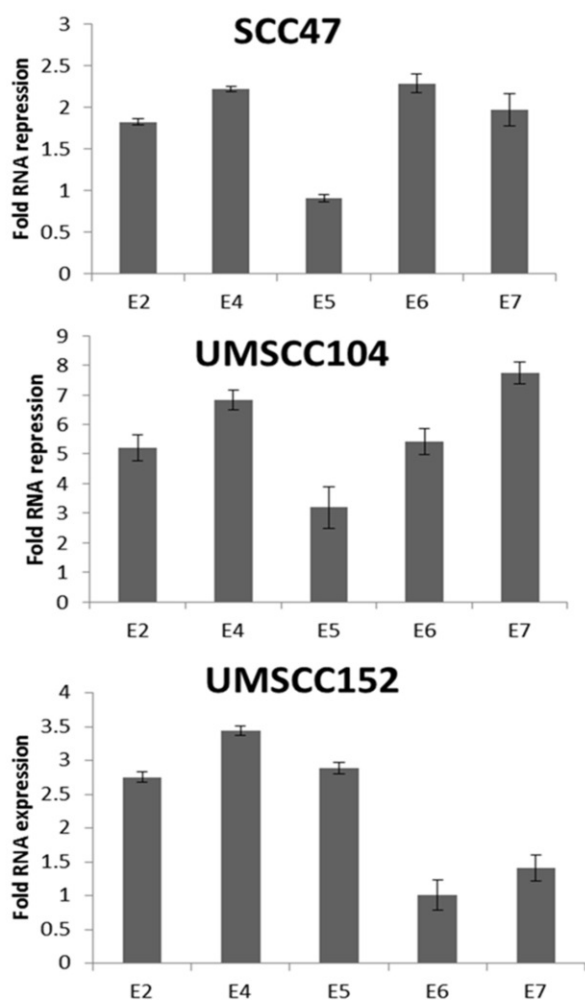

2B

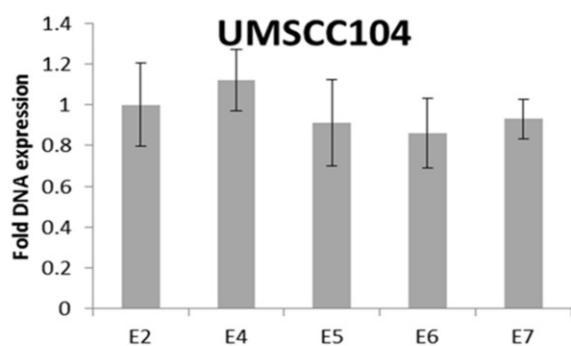

**Figure 2: Estrogen significantly represses RNA expression of HPV16 early genes.** **A)** SCC47, UMSCC104, and UMSCC152 cells were grown in the presence or absence of 15 $\mu$ M estrogen for 7 days. Cells were then harvested and RNA expression levels were monitored via qPCR for E2, E4, E5, E6 and E7, and compared to the loading control GAPDH. Data is presented as fold repression calculated from  $\Delta\Delta$ CT calculated from the comparison of levels observed in control cells and further compared to GAPDH levels. **B)** Cells were treated as in A and DNA levels of E2, E4, E5, E6 and E7 levels were monitored via qPCR. Data is presented as fold repression calculated from  $\Delta\Delta$ CT calculated from the comparison of levels observed in control cells and further compared to GAPDH levels. No significant DNA changes were observed in any of the cell lines and UMSCC104 is presented as representative data. Experiments were conducted in triplicate and error bars are representative of SE.

3A

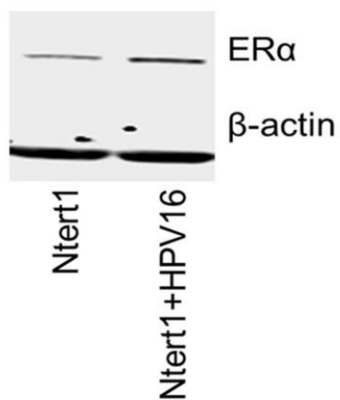

3B

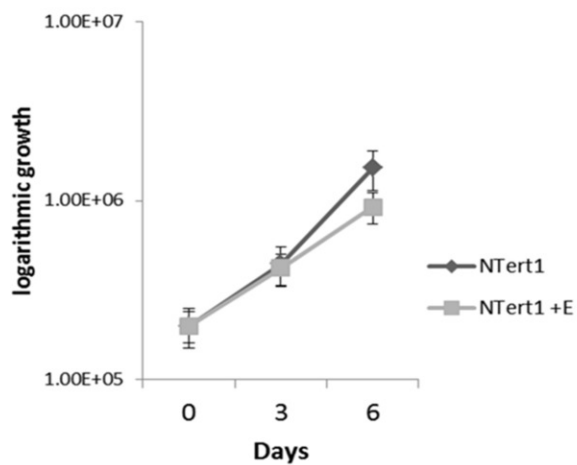

3C

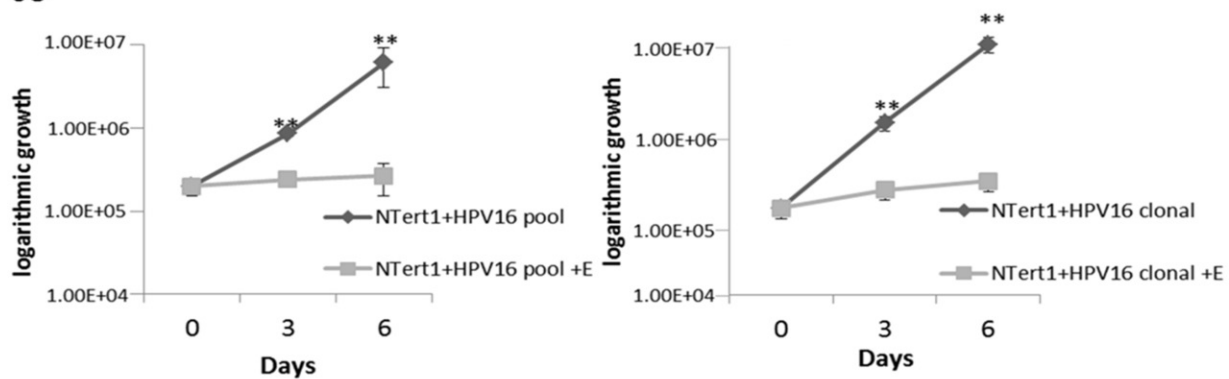

3D

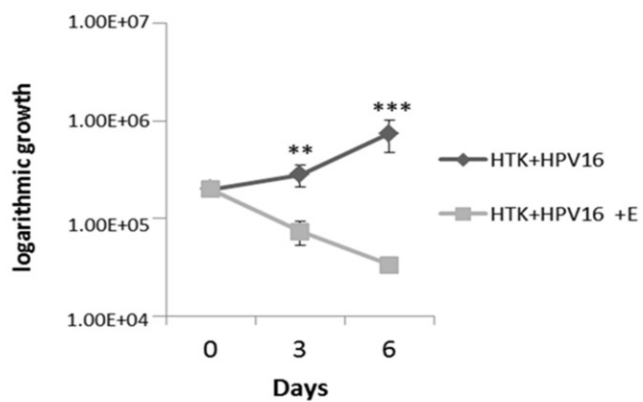

3E

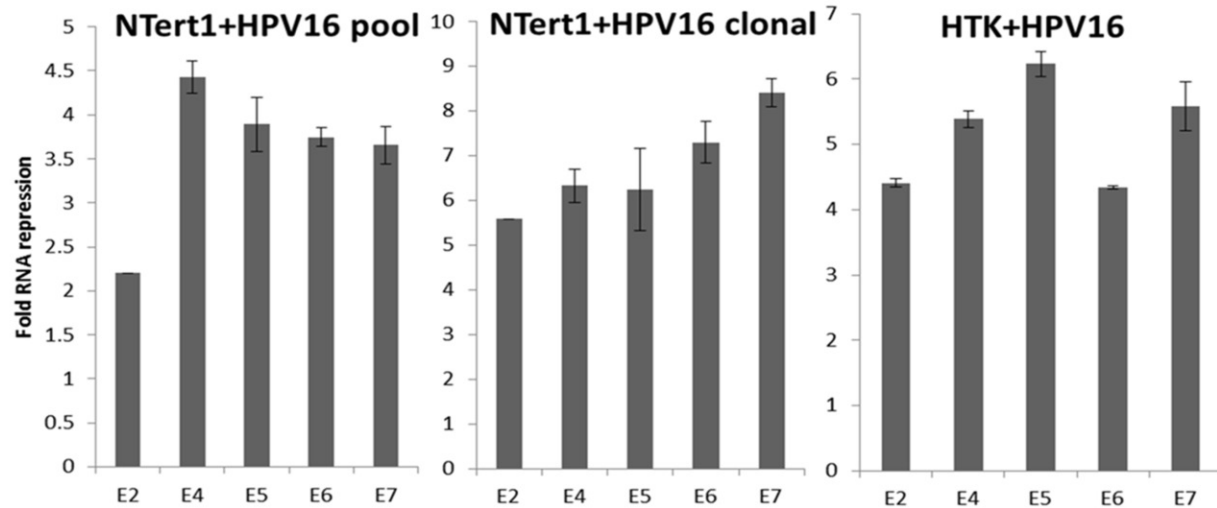

**Figure 3: HPV16 confers estrogen sensitivity onto N/Tert-1 cells.** **A)** Parental N/Tert-1 cell lines and our clonal N/Tert-1+HPV16 cells lines were analyzed for their overall ER $\alpha$  expression levels and compared to the loading control  $\beta$ -actin. **B-D)** N/Tert-1 (**B**), N/Tert-1+HPV16 (pool and clonal) (**C**), and HTK+HPV16 (**D**) cells were seeded on day zero and grown in the presence or absence of 15mM estrogen. Cells were trypsinized and counted on day 3 and day 6 and cell counts are presented on a logarithmic scale. Statistical differences can be observed at both day 3 and day 6 in all lines except the parental N/Tert-1 cells. \*\* $p < 0.001$  \*\*\* $p, 0.0001$ . Experiments were conducted in triplicate and error bars are representative of SE. **E)** Pooled N/Tert-1+HPV16, clonal N/Tert-1+HPV16, and pooled HTK+HPV16 cells were grown in the presence or absence of 15 $\mu$ M estrogen for 7 days. Cells were then harvested and RNA expression levels were monitored via qPCR for E2, E4, E5, E6 and E7, and compared to the loading control GAPDH. Data is presented as fold repression calculated from  $\Delta\Delta$ CT calculated from the comparison of levels observed in control cells and further compared to GAPDH levels. Experiments were conducted in triplicate and error bars are representative of SE.



4A

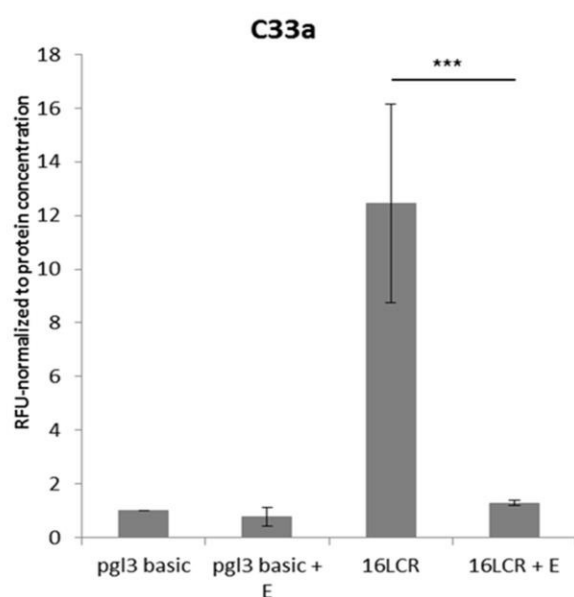

4B

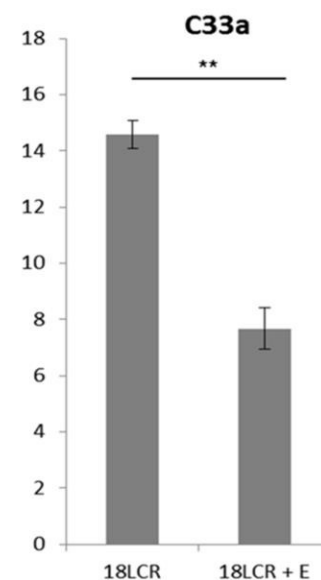

4C

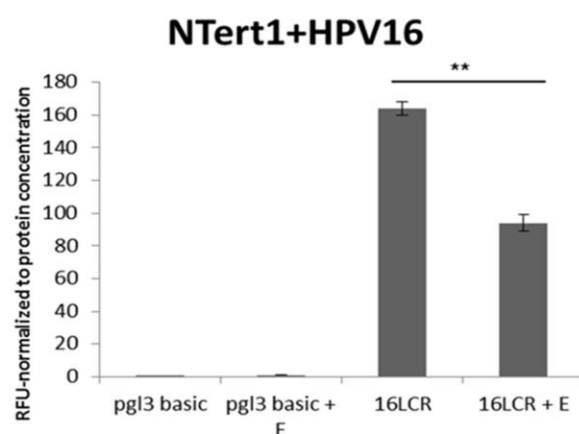

**Figure 4: Estrogen significantly represses HPV16 and HPV18 LCR transcription. A)**

C33a cells were transfected with 1 $\mu$ g of pgl3 basic backbone (control), 1 $\mu$ g 16LCR-pGL3, or in **B)** 1 $\mu$ g 18-LCR-pGL3 and grown in the presence or absence of 15 $\mu$ M estrogen. **C)** N/Tert-1 cells were transfected with 1 $\mu$ g of pgl3 basic backbone, or 1 $\mu$ g 16LCR-pGL3 and grown in the presence or absence of 15 $\mu$ M estrogen. Forty-eight hours post transfection, a luciferase-based assay was utilized to monitor levels of LCR transcription. Data is presented as RFU, normalized to total protein concentration as monitored by a standard BSA assay. \*\*p<0.001 \*\*\*p<0.0001

5A

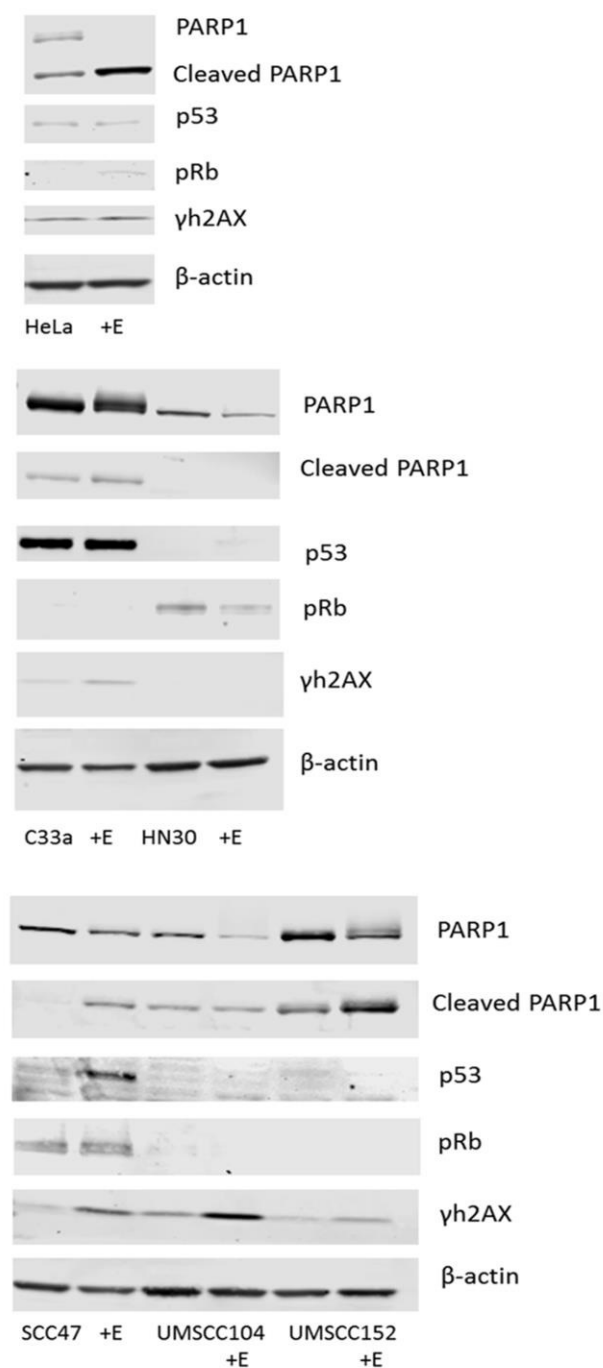

5B

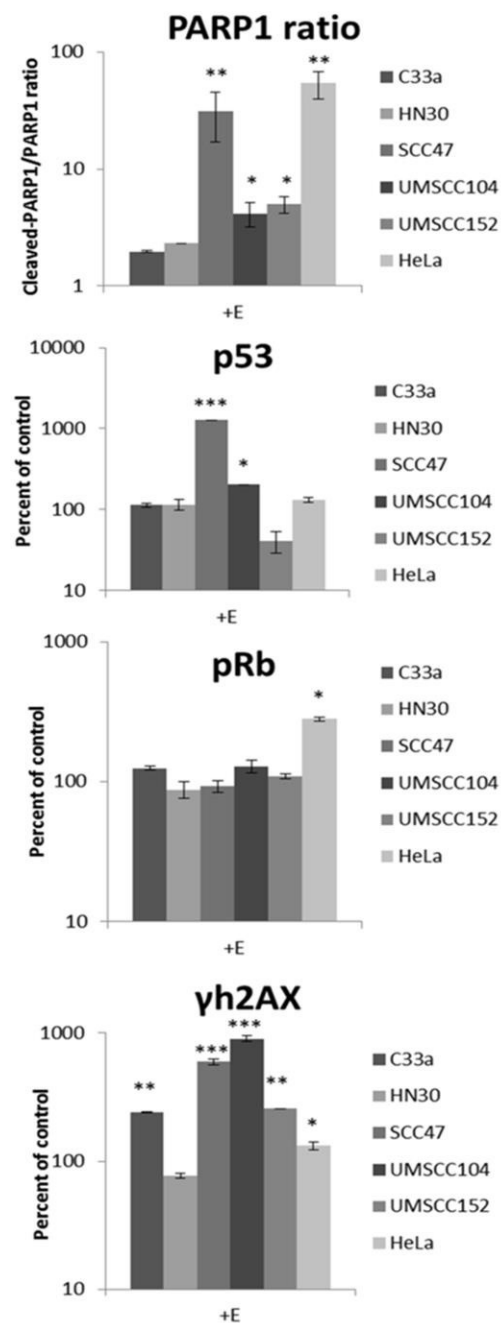

**Figure 5: Estrogen alteration of protein expression in cancer cell lines. A)** HPV18+ HeLa (top panel), HPV- C33a and HN30 (middle panel), and HPV16+ SCC47, UMSCC104, and UMSCC152 cells (bottom panel) were grown in the presence or absence of 15 $\mu$ M estrogen for 48 hours. Cells were then lysed and analyzed via western blot for PARP1, cleaved-PARP1, p53, pRb, and  $\gamma$ h2AX.  $\beta$ -actin was used as a loading control. **B)** Densitometry analysis was compared from three independent experiments. For PARP1 the ratio of cleaved to non-cleaved PARP1 is given and the rest are presented in graphs as percent of control cells. All are normalized to loading control, and are in log scale.

6A

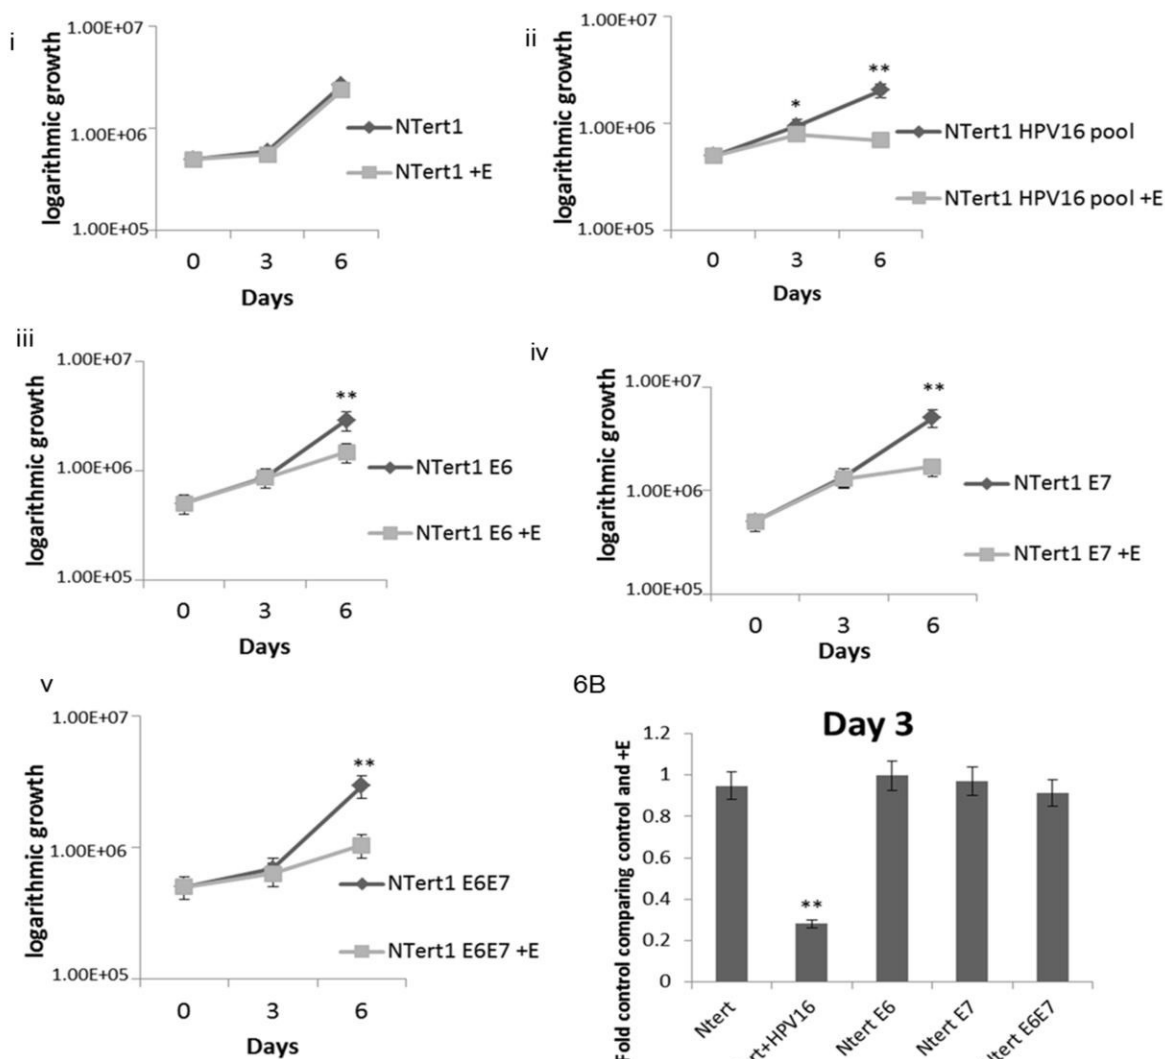

6B

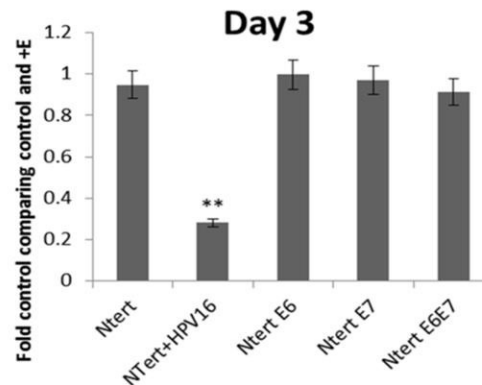

6C

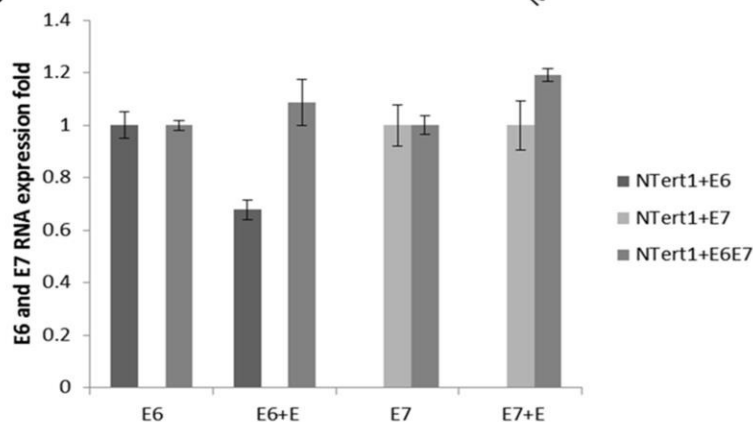

**Figure 6: E6 and E7 expression by themselves sensitizes N/Tert-1 cells to estrogen.** A (i) N/Tert-1, (ii) N/Tert-1+HPV16, (iii) N/Tert-1+E6, (iv) N/Tert-1+E7, and (v) N/Tert-1+E6E7 cells were seeded on day zero and grown in the presence or absence of estrogen. Cells were trypsinized and counted on day 3 and day 6 and cell counts are presented on a logarithmic scale. Statistical differences can be observed at both day 3 and day 6 (ii), but only on day 6 in (iii-v) \*p<0.05 \*\*p<0.001. B). Day 3 cell counts are compared as percent of control and normalized, only N/Tert-1+HPV16 presents statistical difference at this time point. \*\*p<0.001. C) N/Tert-1+E6, N/Tert-1+E7, and N/Tert-1+E6E7 cells were analyzed for their RNA expression levels of E6 and E7, and compared to the loading control GAPDH. Data is presented as fold expression as calculated from  $\Delta\Delta CT$  calculated from the comparison of levels observed in control cells and further compared to GAPDH levels. No statistical differences were found.

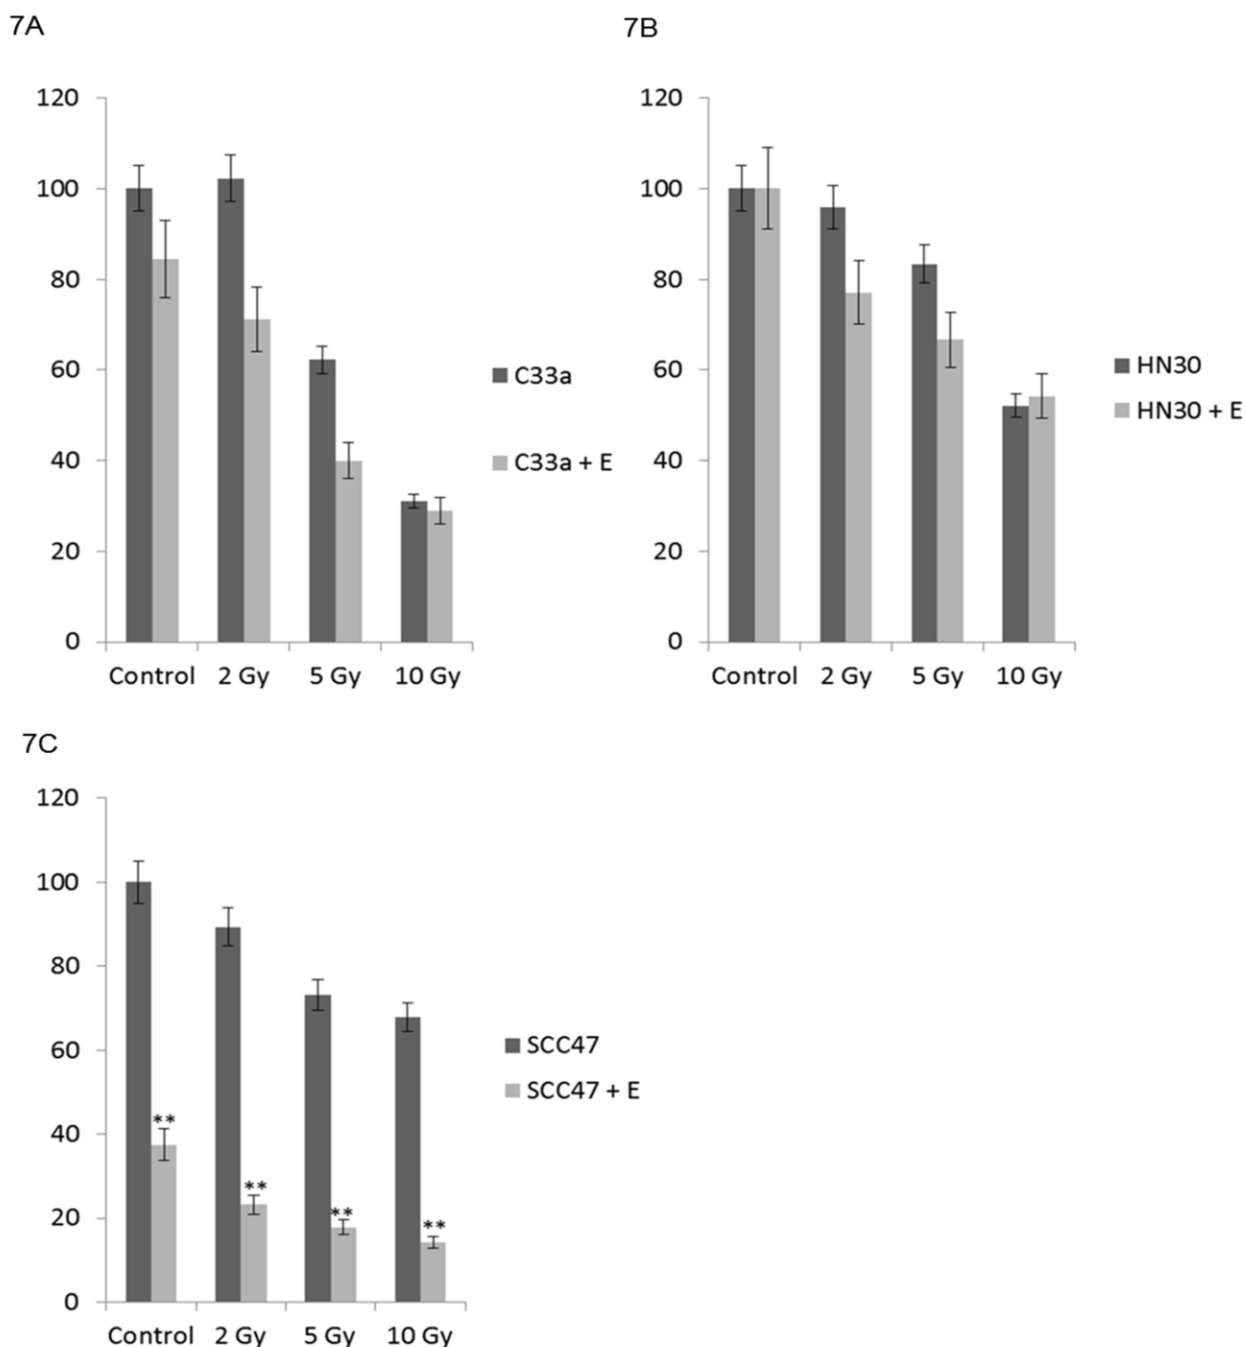

**Figure 7: Estrogen enhances the response to radiation in SCC47 cells but not in C33a or HN30 cells.** A) C33a B) HN30, and C) SCC47 cells were maintained in estrogen for 72 hours. Noted cells were then radiated with 2, 5, or 10 Gy radiation, and cells were trypsinized and counted by trypan blue exclusion for viability 72-hours post-irradiation. Data is presented as % viability compared with untreated control cells. Experiments were conducted in triplicate and error bars are representative of SE. \*\* $p < 0.001$ .
